# Supplementary material for: Screening of Novel Antimicrobial Diastereomers of Azithromycin–Thiosemicarbazone Conjugates: A Combined LC-SPE/Cryo NMR, MS/MS and Molecular Modeling Approach
Source: Antibiotics (Basel). 2022 Dec 2;11(12):1738. doi: 10.3390/antibiotics11121738 (PMC9774193; doi:10.3390/antibiotics11121738)
Supplement: Supplementary file 1 [file antibiotics-11-01738-s001.zip › antibiotics-2059833-supplementary.pdf]

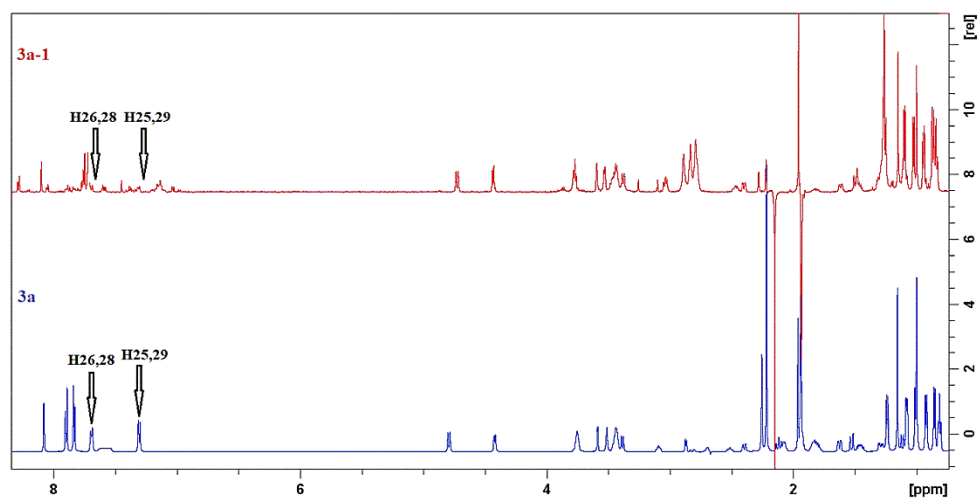

**Figure S1.** Comparison of  $^1\text{H}$  NMR spectra of the macrozone **3a** (blue) and component **3a-1** (red).

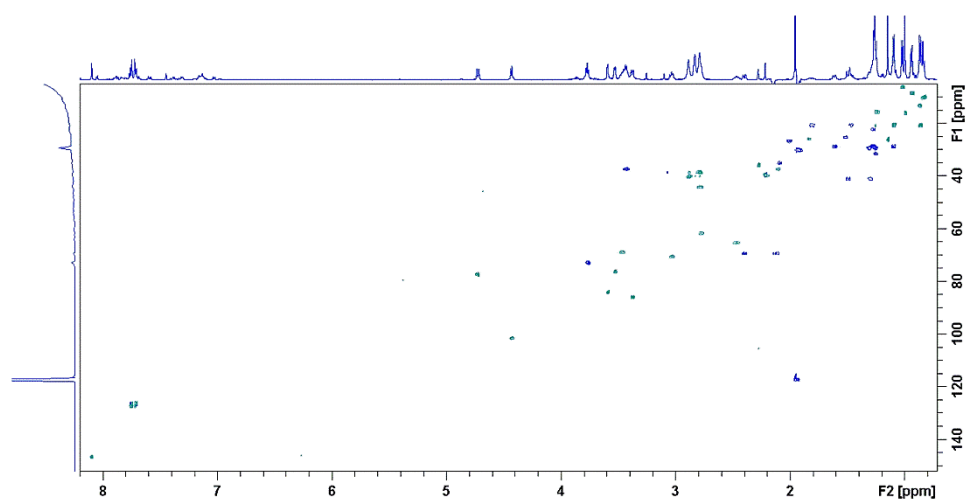

**Figure S2.**  $^1\text{H}$ - $^{13}\text{C}$  HSQC spectrum of the component **3a-1**.

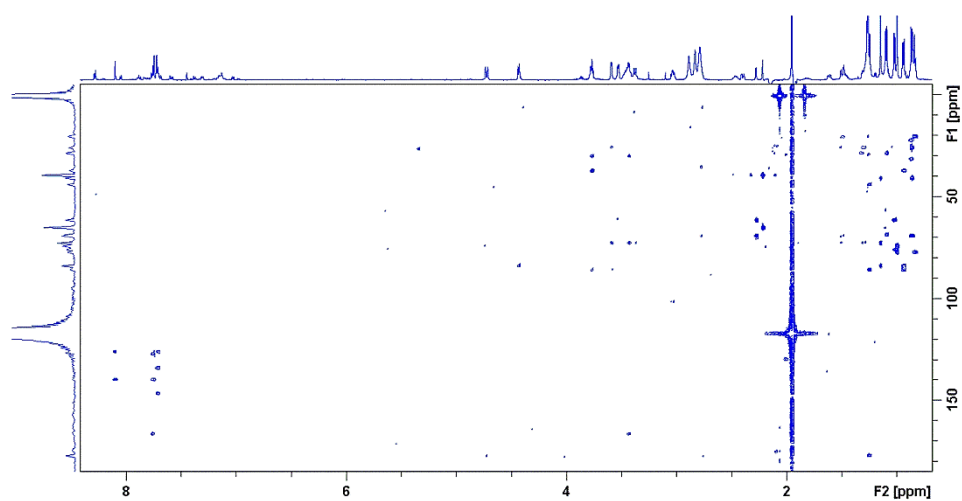

**Figure S3.**  $^1\text{H}$ - $^{13}\text{C}$  HMBC spectrum of the component **3a-1**.

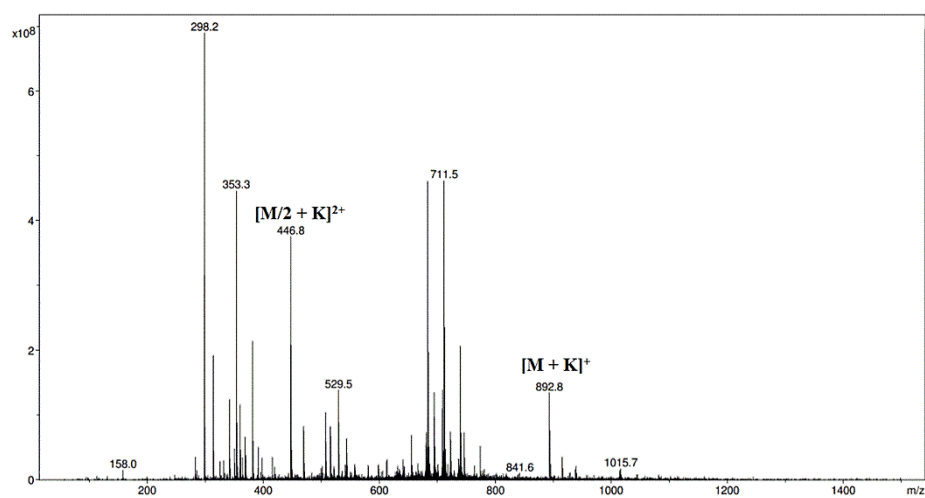

**Figure S4.** MS spectrum of the component 3a-1.

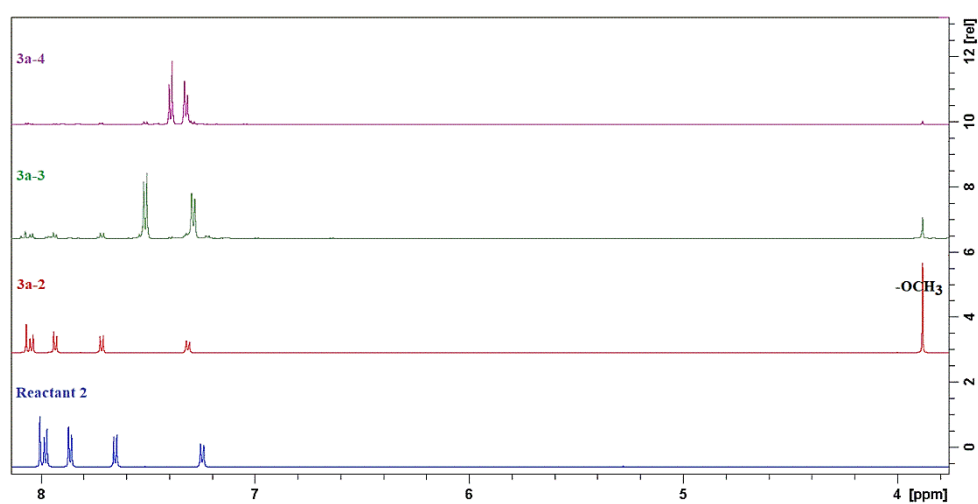

**Figure S5.** Comparison of  $^1\text{H}$  NMR spectra of the reactant 2 (blue), component 3a-2 (red), component 3a-3 (green) and component 3a-4 (purple).

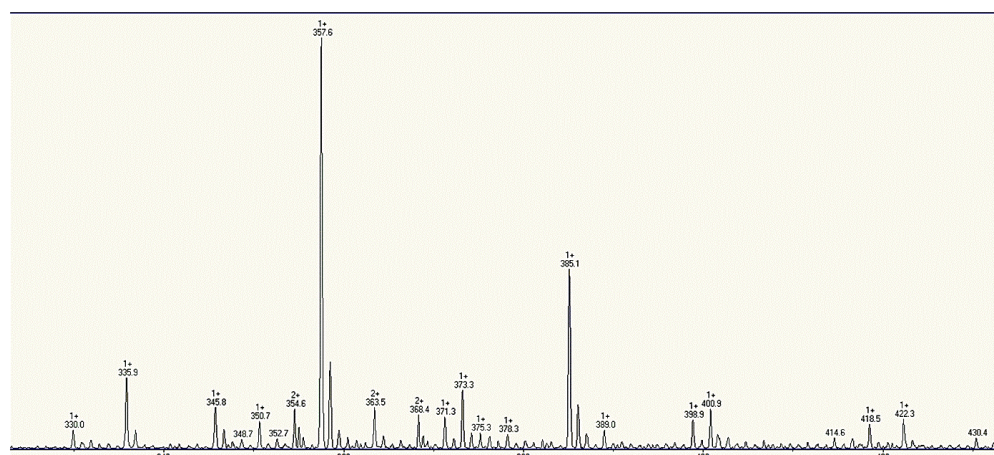

**Figure S6.** MS spectrum of the component 3a-2.

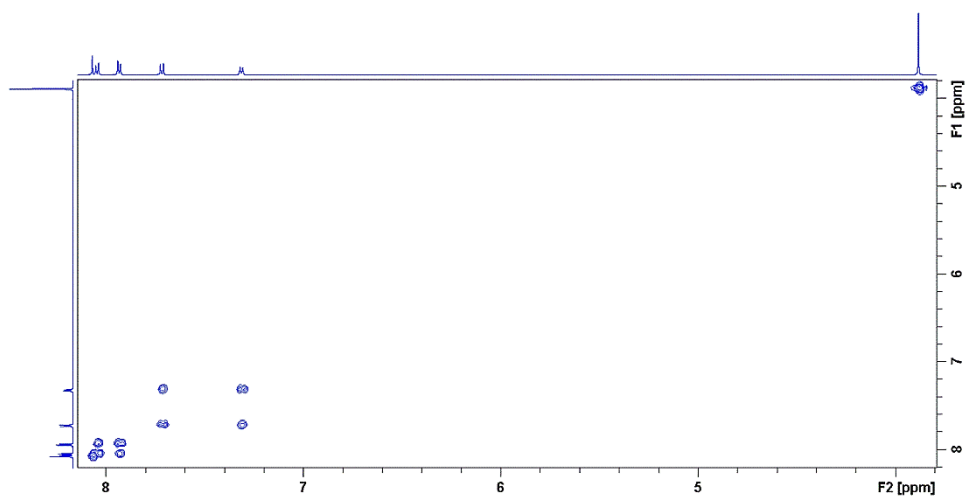

**Figure S7.** COSY spectrum of the component **3a-2**.

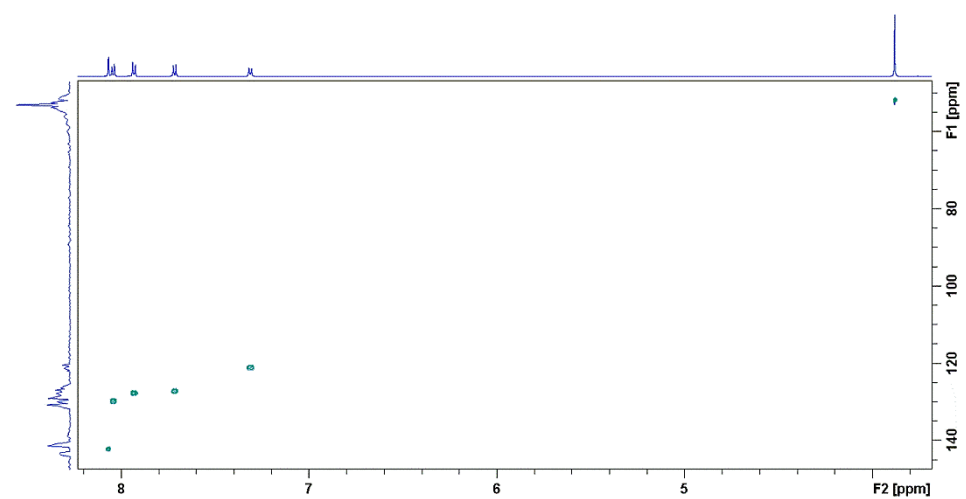

**Figure S8.**  $^1\text{H}$ - $^{13}\text{C}$  HSQC spectrum of the component **3a-2**.

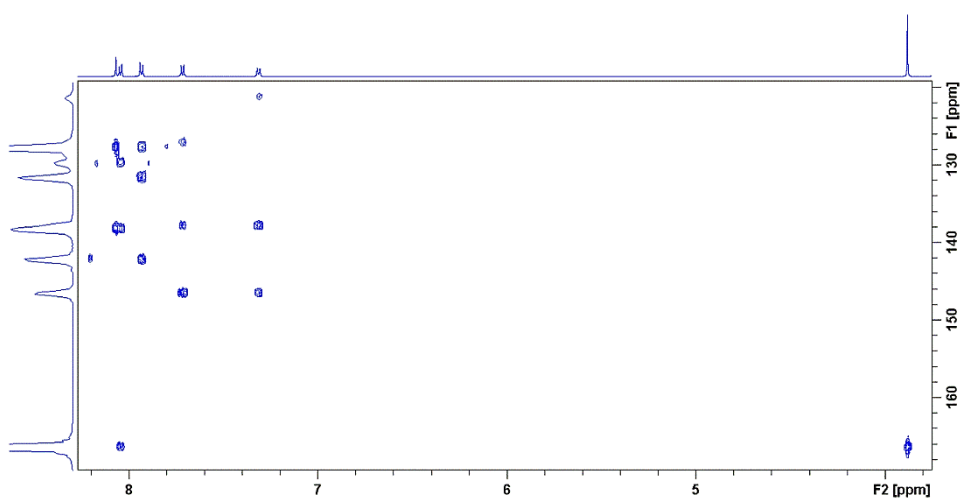

**Figure S9.**  $^1\text{H}$ - $^{13}\text{C}$  HMBC spectrum of the component **3a-2**.

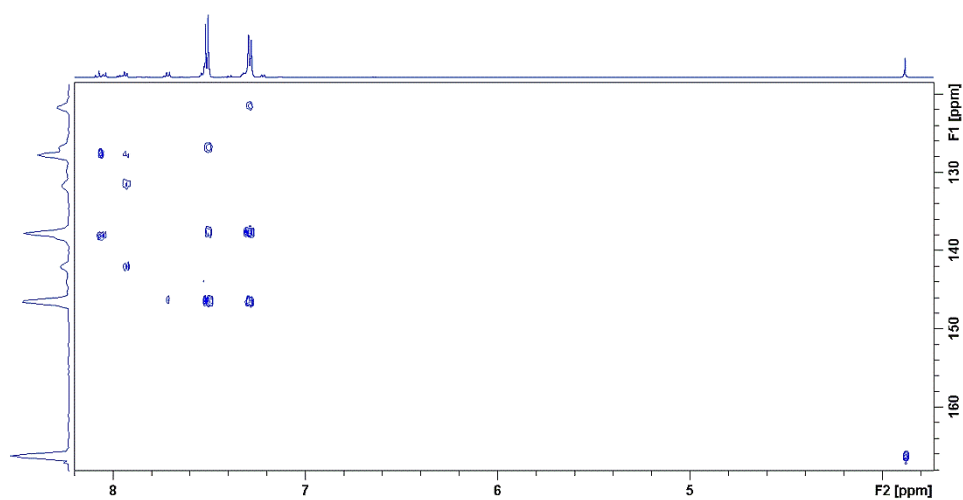

**Figure S10.**  $^1\text{H}$ - $^{13}\text{C}$  HMBC spectrum of the component **3a-3**.

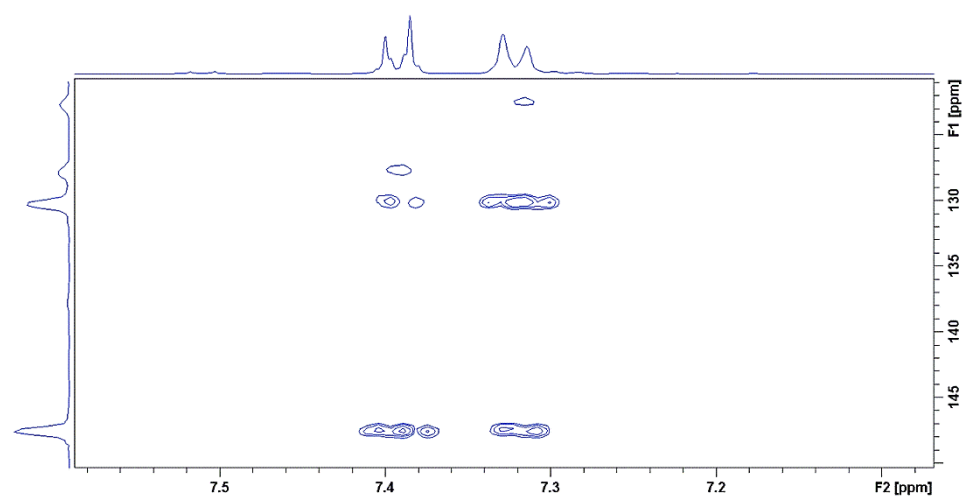

**Figure S11.**  $^1\text{H}$ - $^{13}\text{C}$  HMBC spectrum of the component **3a-4**.

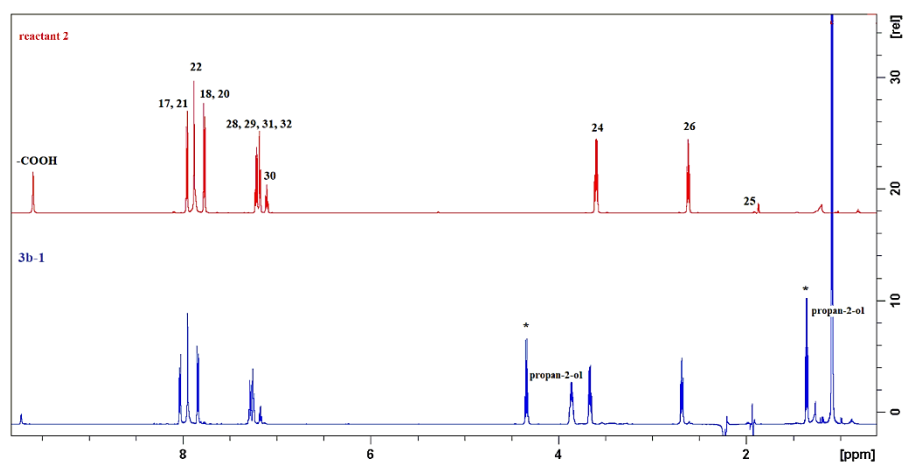

**Figure S12.** Comparison of  $^1\text{H}$  NMR spectra of the reactant **2** (red) and component **3b-1** (blue). New signals in the spectrum of **3b-1** are marked with asterisk.

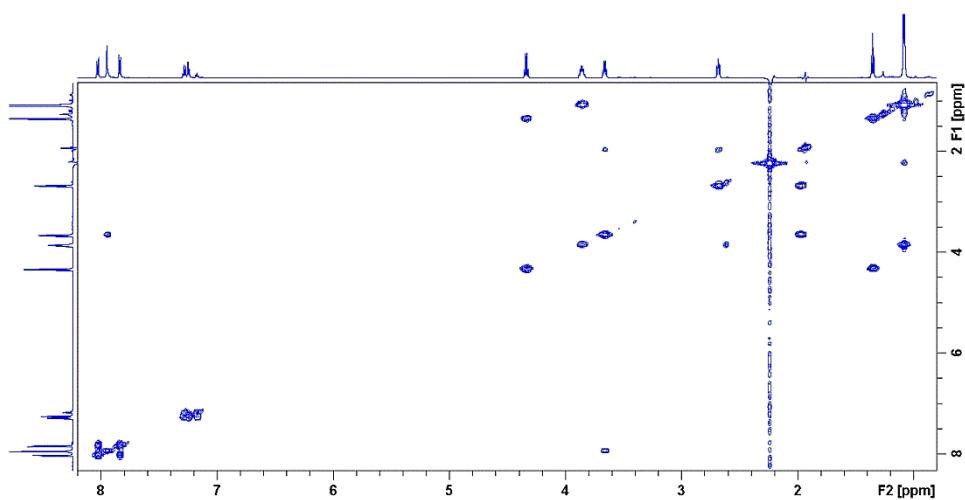

**Figure S13.** COSY spectrum of the component **3b-1**.

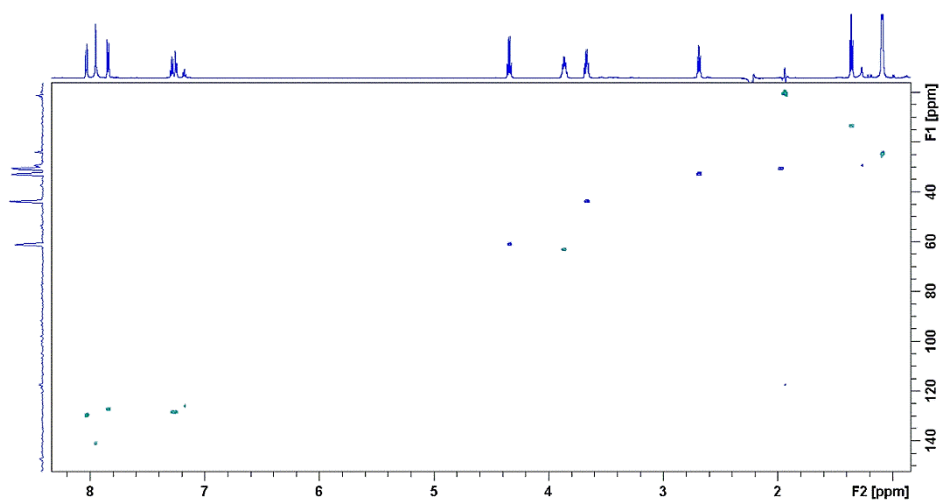

**Figure S14.** <sup>1</sup>H-<sup>13</sup>C HSQC spectrum of the component **3b-1**.

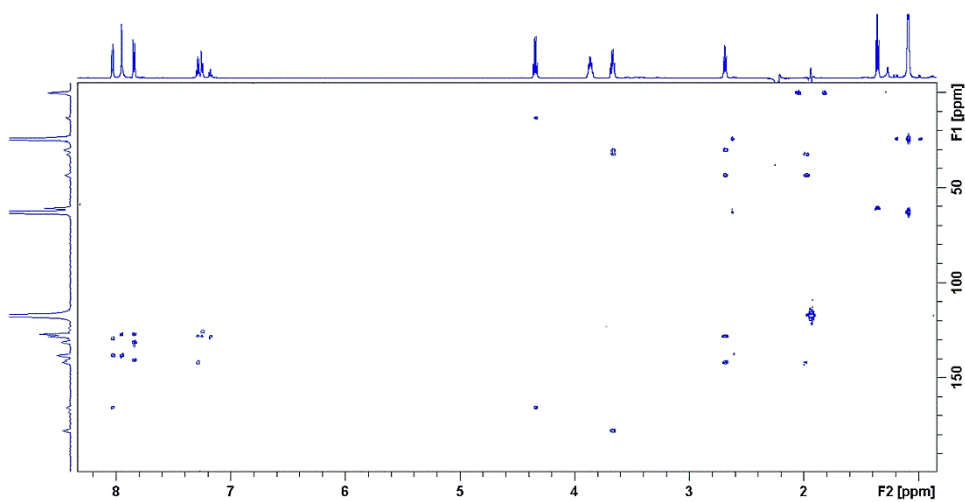

**Figure S15.** <sup>1</sup>H-<sup>13</sup>C HMBC spectrum of the component **3b-1**.

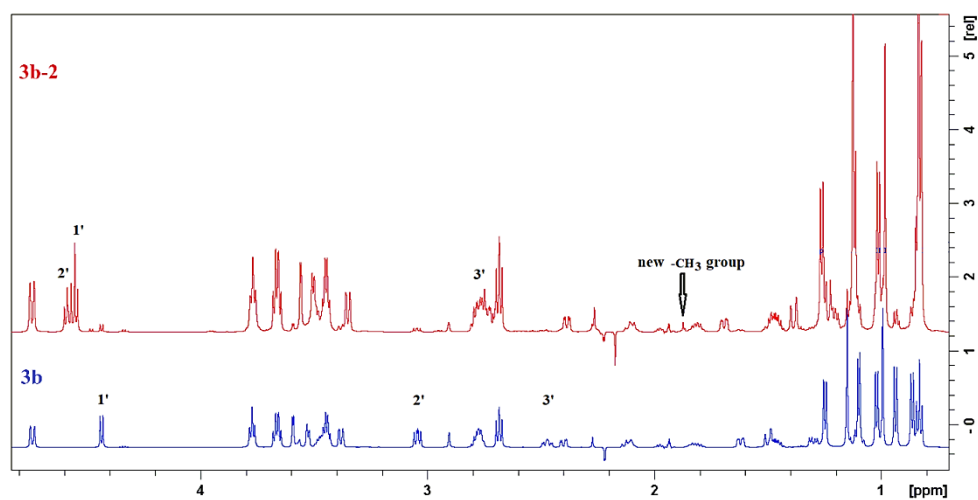

**Figure S16.** Comparison of  $^1\text{H}$  NMR spectra of the macrozone **3b** (blue) and component **3b-2** (red).

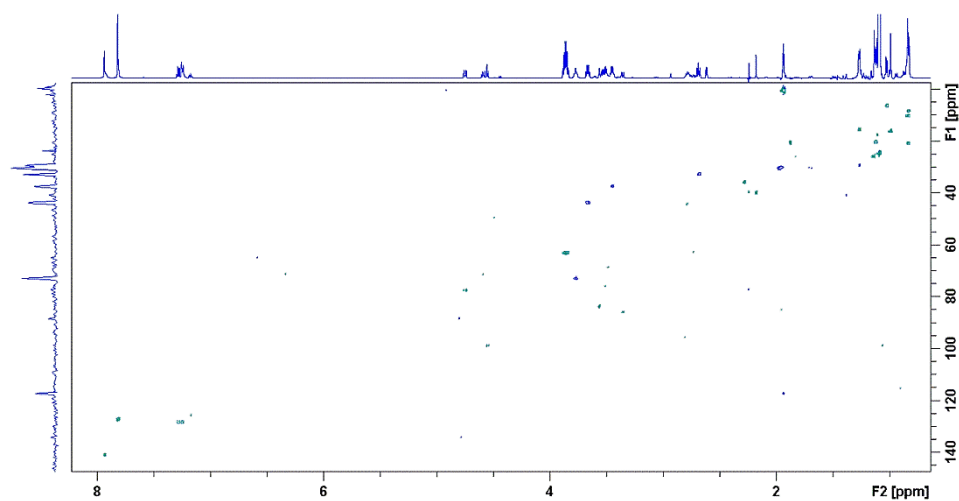

**Figure S17.**  $^1\text{H}$ - $^{13}\text{C}$  HSQC spectrum of the component **3b-2**.

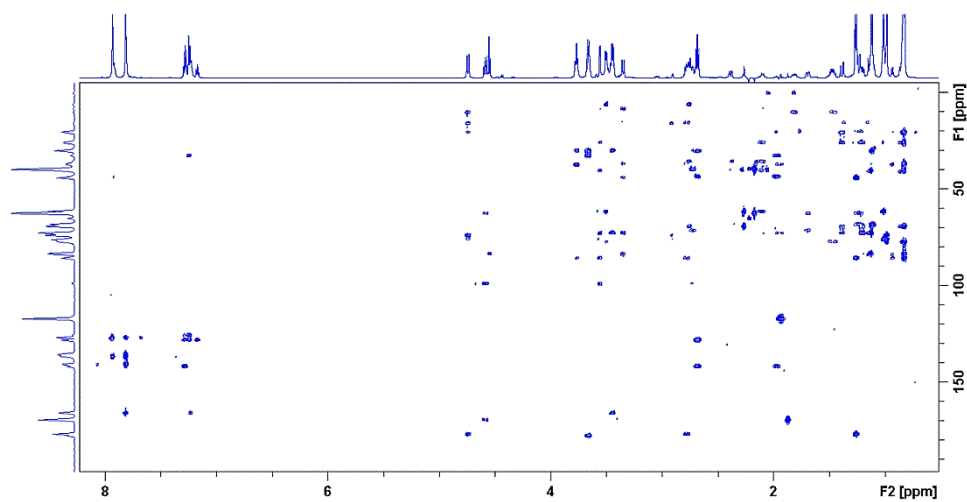

**Figure S18.**  $^1\text{H}$ - $^{13}\text{C}$  HMBC spectrum of the component **3b-2**.

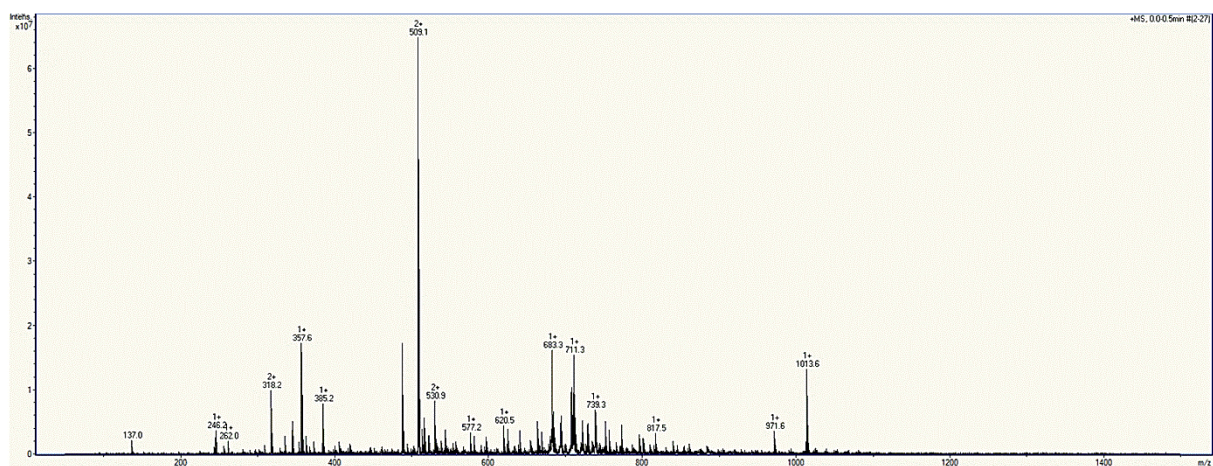

**Figure S19.** MS spectrum of the component **3b-2**.

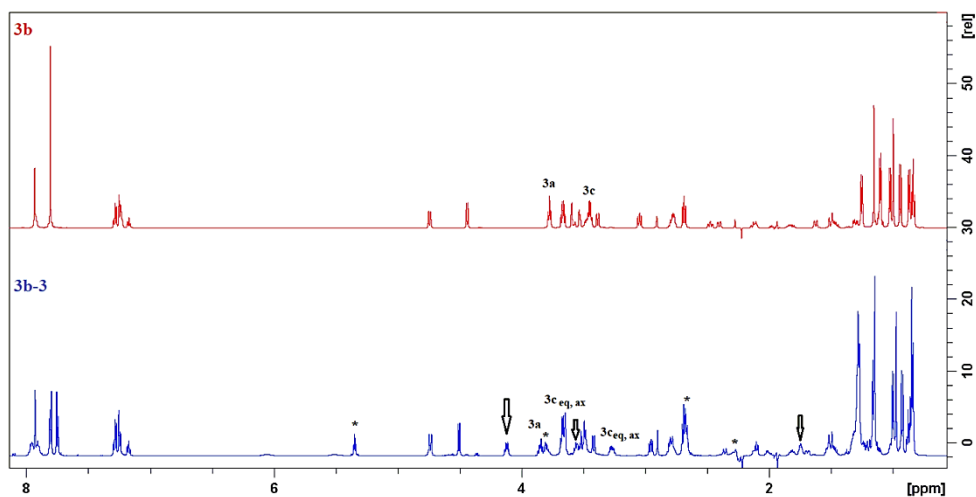

**Figure S20.** Comparison of <sup>1</sup>H NMR spectra of the macrozone **3b** (red) and component **3b-3** (blue). Signals of the ethylene moiety -CH<sub>2</sub>-CH<sub>2</sub>-R in the spectrum of **3b-3** are marked with an arrow. Signals of the unknown impurity are marked with asterisk.

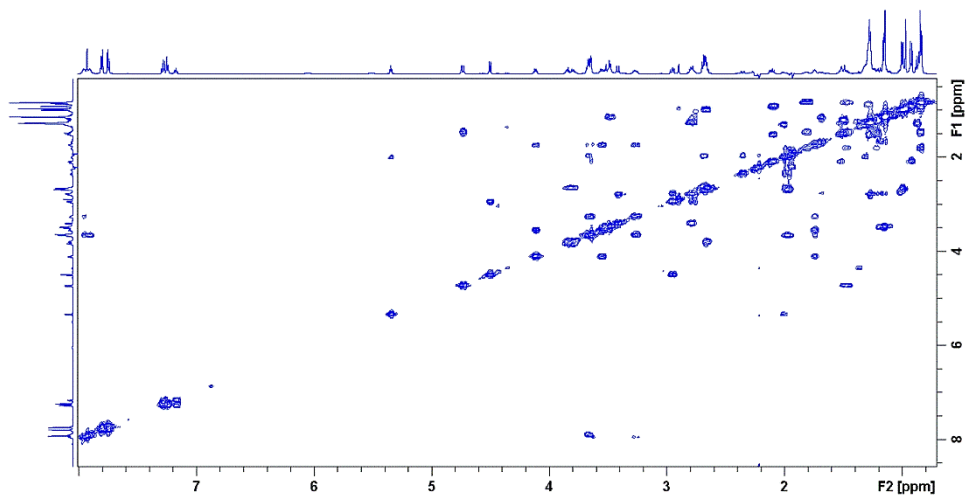

**Figure S21.** COSY spectrum of the component **3b-3**.

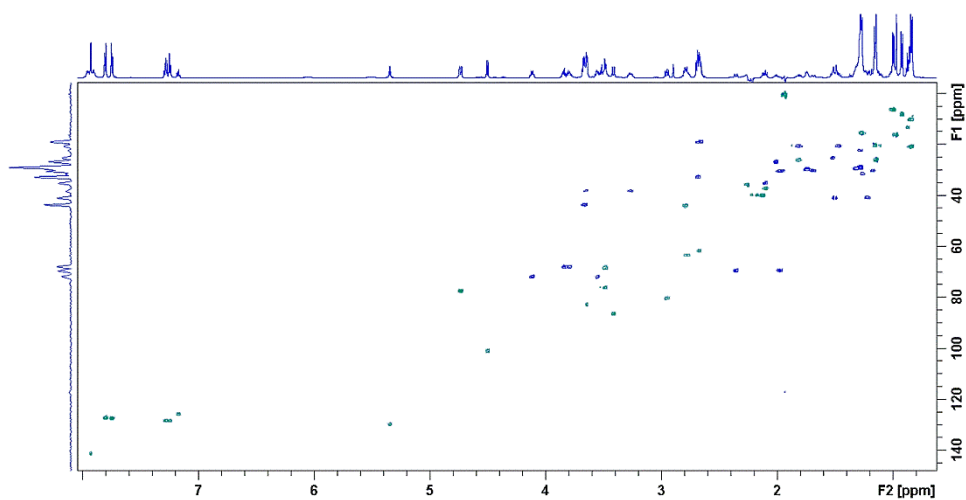

**Figure S22.**  $^1\text{H}$ - $^{13}\text{C}$  HSQC spectrum of the component **3b-3**.

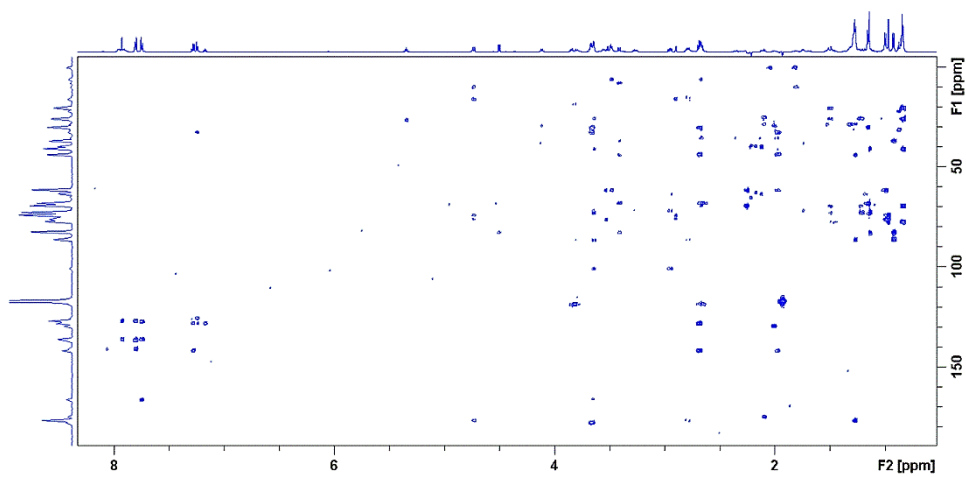

**Figure S23.**  $^1\text{H}$ - $^{13}\text{C}$  HMBC spectrum of the component **3b-3**.

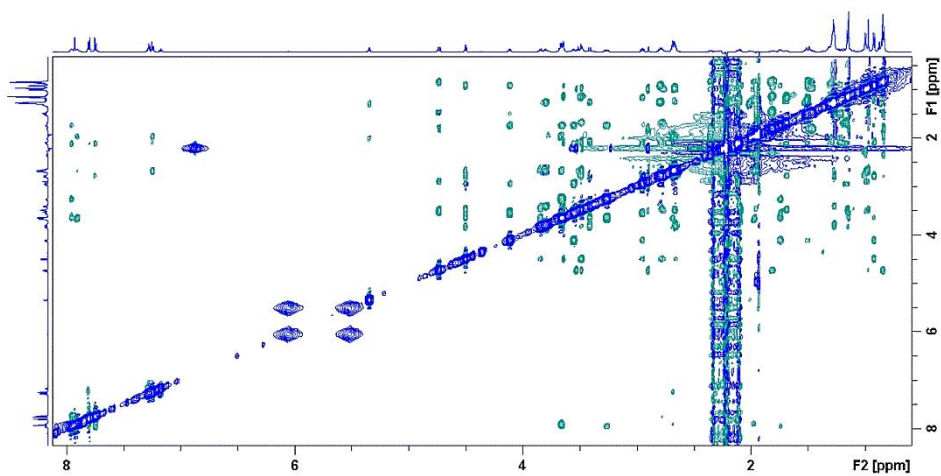

**Figure S24.** NOESY spectrum of the component **3b-3**.

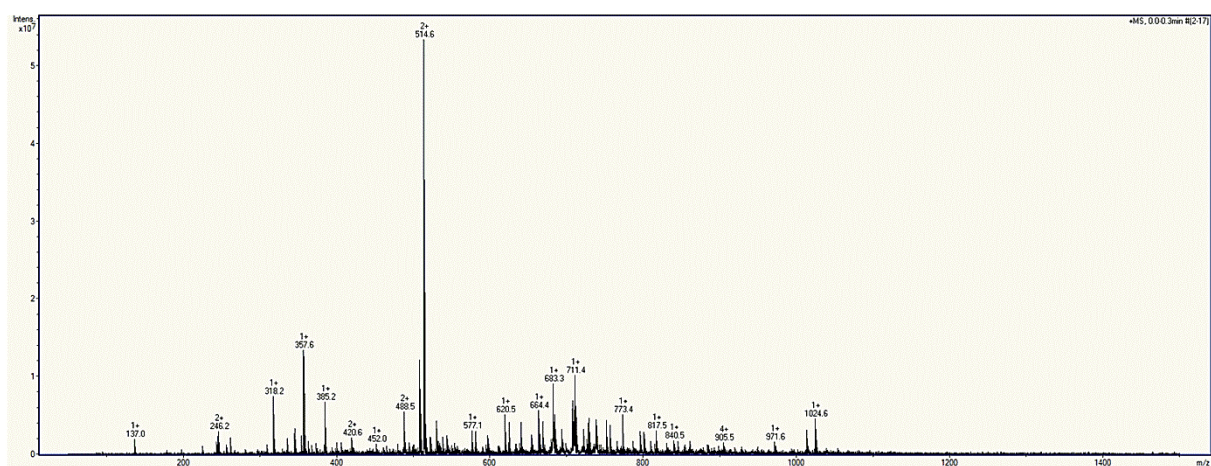

Figure S25. MS spectrum of the component 3b-3.

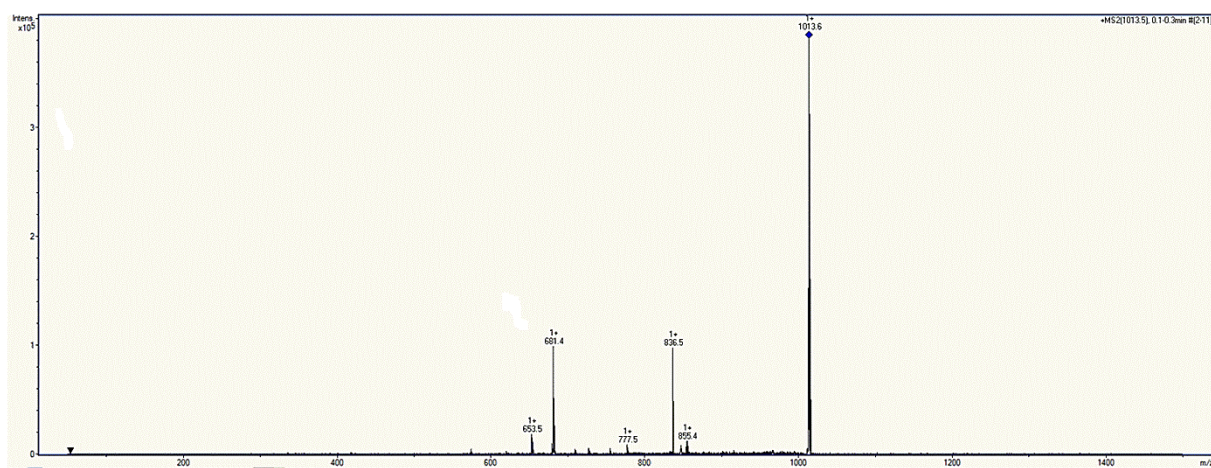

Figure S26. MS spectrum of the component 3a-6.

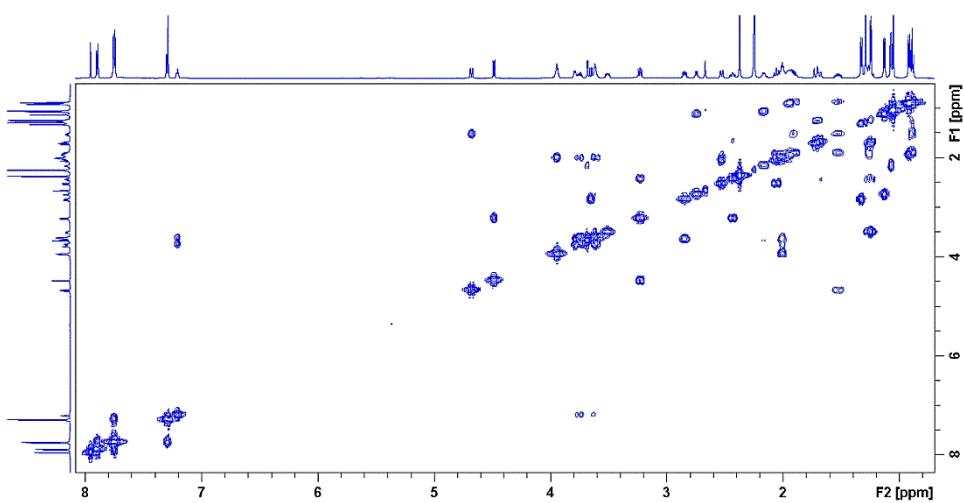

Figure S27. COSY spectrum of the macrozone 3a.

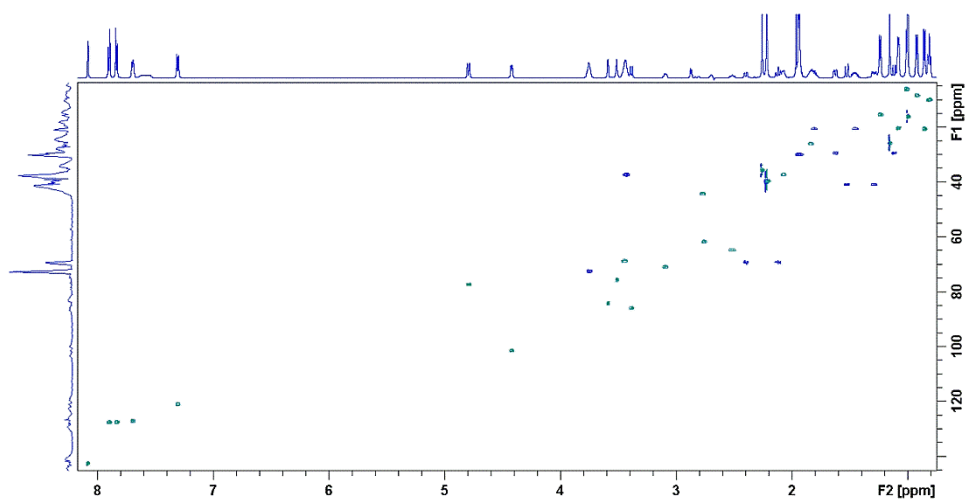

**Figure S28.**  $^1\text{H}$ - $^{13}\text{C}$  HSQC spectrum of the macrozone 3a.

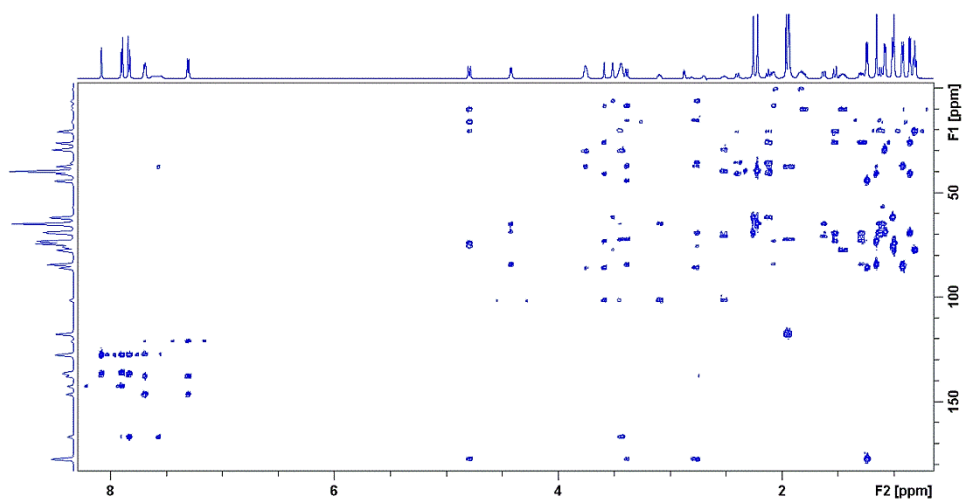

**Figure S29.**  $^1\text{H}$ - $^{13}\text{C}$  HMBC spectrum of the macrozone 3a.

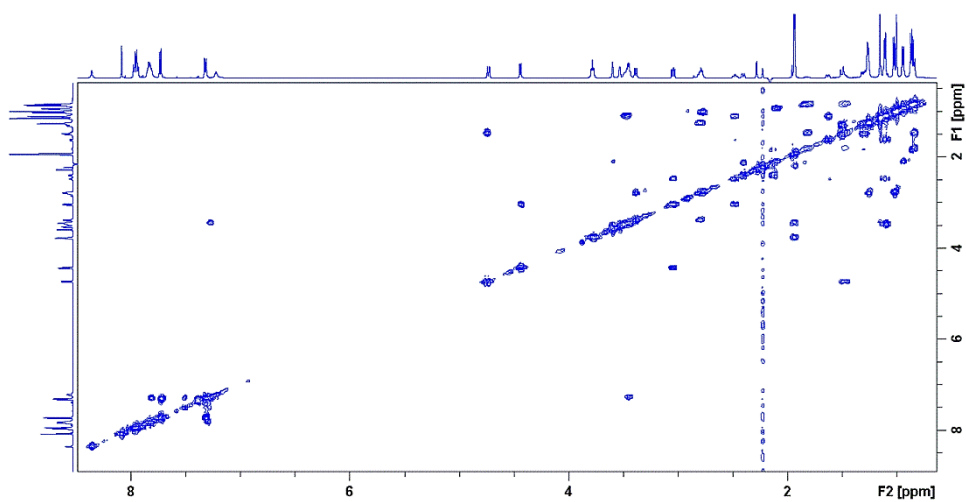

**Figure S30.** COSY spectrum of the macrozone 3a-5.

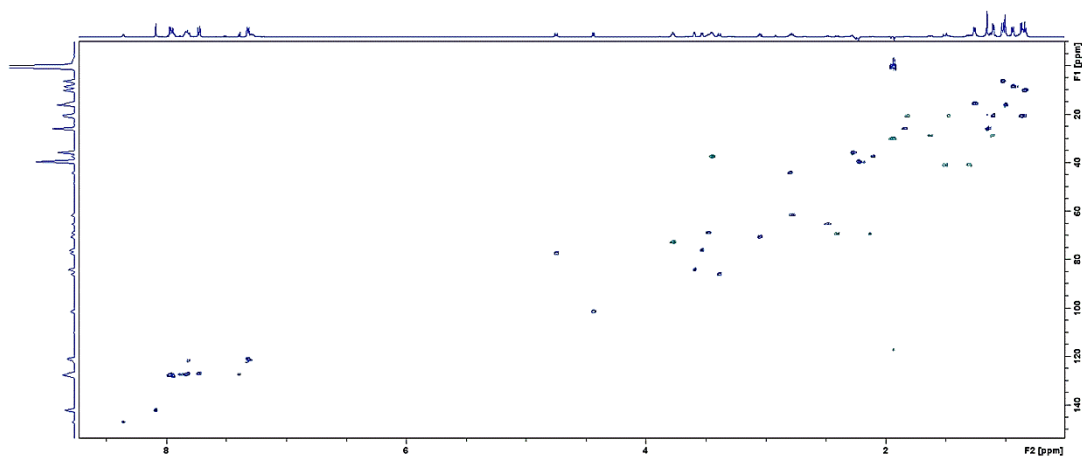

**Figure S31.**  $^1\text{H}$ - $^{13}\text{C}$  HSQC spectrum of the macrozone 3a-5.

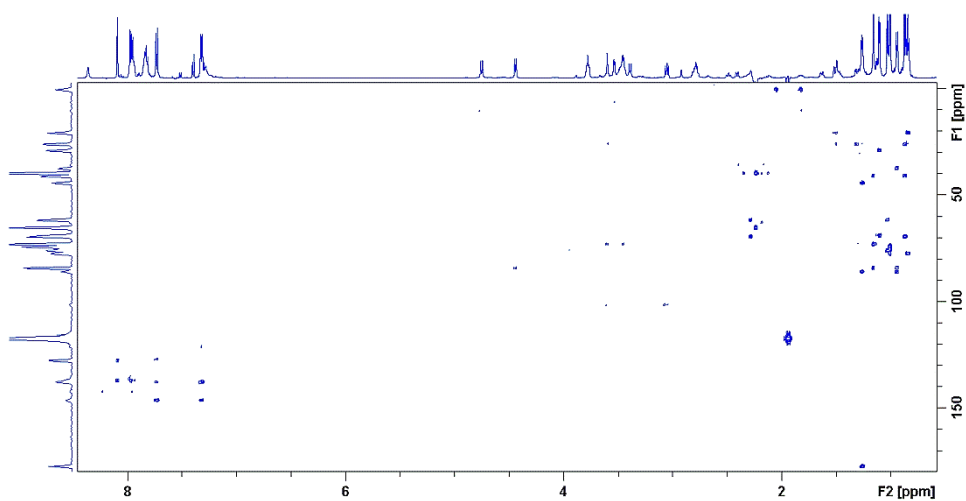

**Figure S32.**  $^1\text{H}$ - $^{13}\text{C}$  HMBC spectrum of the macrozone 3a-5.

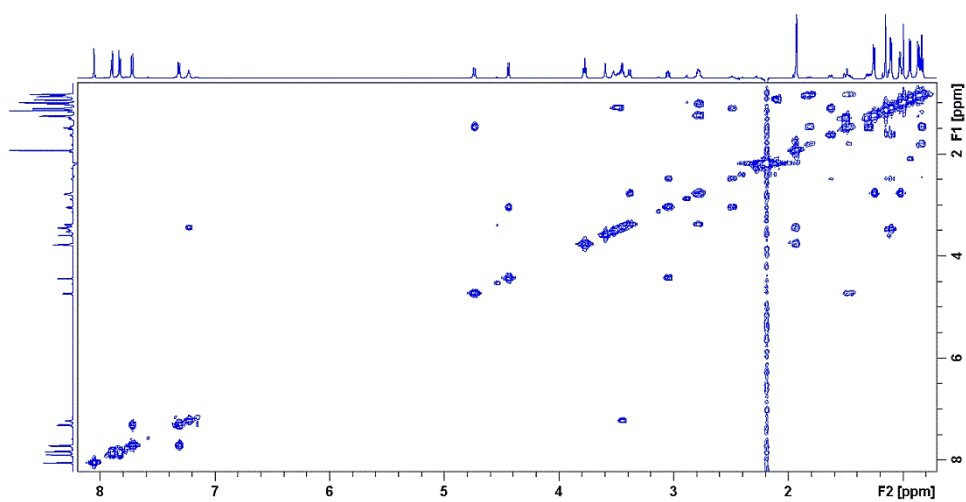

**Figure S33.** COSY spectrum of the macrozone 3a-6.

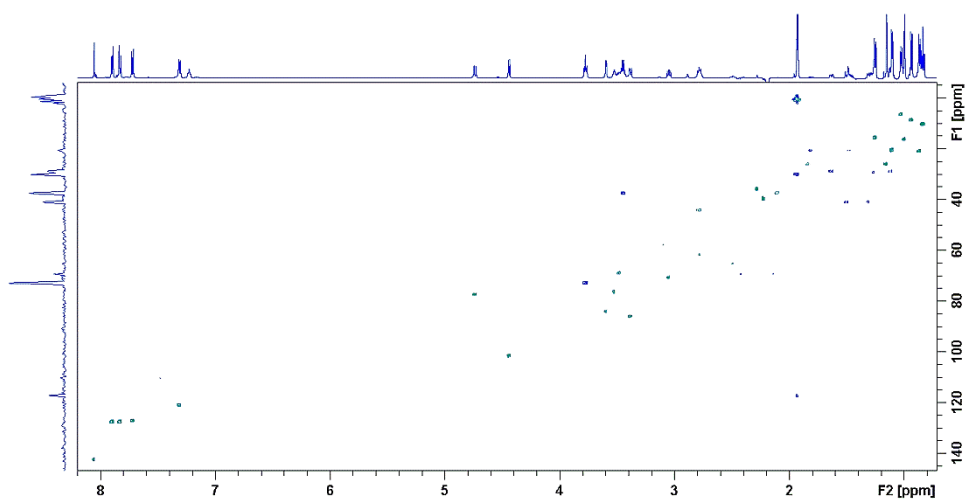

**Figure S34.**  $^1\text{H}$ - $^{13}\text{C}$  HSQC spectrum of the macrozone **3a-6**.

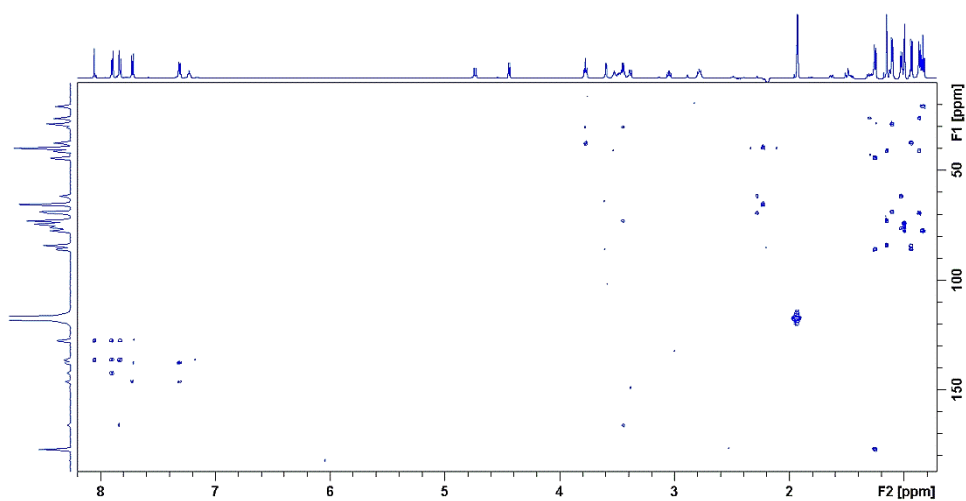

**Figure S35.**  $^1\text{H}$ - $^{13}\text{C}$  HMBC spectrum of the macrozone **3a-6**.

**Table S1.** Vicinal coupling constants  $^3J_{\text{H}_2/\text{H}_3}$  and NOE proton-proton contacts of isomers of the macrozone **3a** and **3b**.

| Compound | $^3J_{\text{H}_2/\text{H}_3}$ / Hz | H4-H11 | H3-H11 |
|----------|------------------------------------|--------|--------|
| 3a       | 10,12                              | +      | -      |
| 3b       | 10,05                              | +      | -      |
| 3a-5     | 10,31                              | noise  | -      |
| 3b-6     | 10,01                              | +      | -      |
| 3a-6     | 10,07                              | +      | -      |

**Table S2.** Monitored distances around C-2 atom during the 500 ns of molecular dynamics simulations for different diastereomeric configurations.

| Compound    | Configuration of C-2 atom | Distance / nm |           |           |           |           |           |
|-------------|---------------------------|---------------|-----------|-----------|-----------|-----------|-----------|
|             |                           | H2-H14Me      | H2-H11    | H2Me-H7   | H2Me-H9a  | H2Me-H10  | H2Me-H3b  |
| <b>3a</b>   | R                         | 4.2 ± 0.4     | 5.6 ± 0.3 | 6.6 ± 0.3 | 8.6 ± 0.3 | 8.2 ± 0.2 | 4.4 ± 0.3 |
| <b>3a-5</b> | S                         | 5.2 ± 0.3     | 7.1 ± 0.2 | 4.7 ± 0.3 | 4.0 ± 0.4 | 4.4 ± 0.7 | 5.9 ± 0.3 |
| <b>3a-6</b> | R                         | 4.3 ± 0.3     | 4.5 ± 0.3 | 6.8 ± 0.2 | 9.0 ± 0.3 | 7.9 ± 0.2 | 4.4 ± 0.3 |

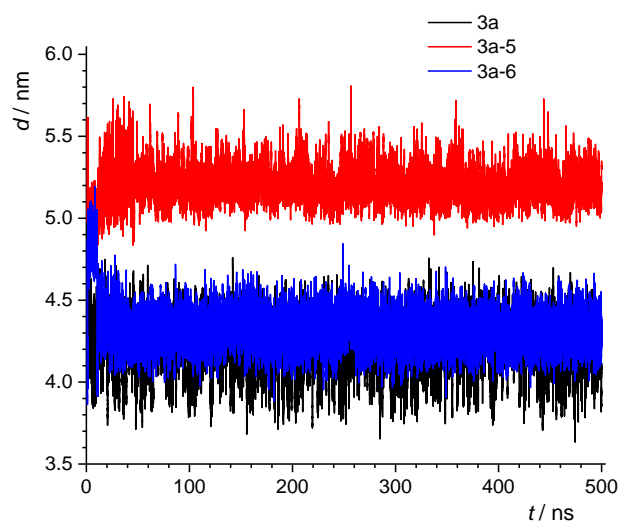

**Figure S36.** Distance between H-2 and H-14Me atoms during the MD simulations of compounds: **3a**, **3a-5** and **3a-6**. To reduce noise, each point ( $d_i$ ) is given as an average value of previous and following five points ( $d = \frac{\sum_{i-5}^{i+5} d_i}{11}$ ).

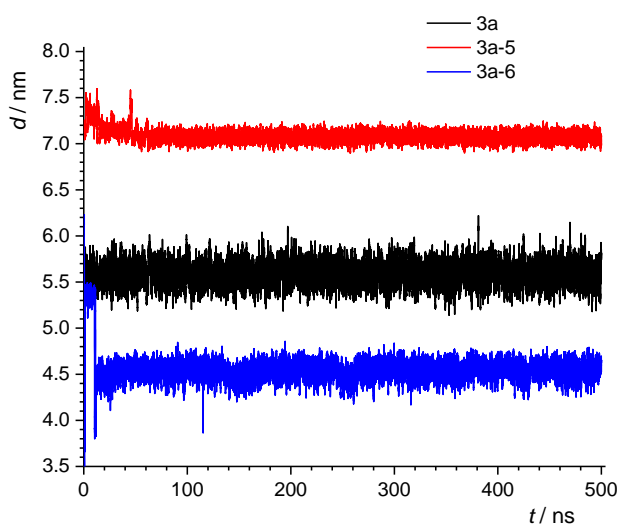

**Figure S37.** Distance between H-2 and H-11 atoms during the MD simulations of compounds: **3a**, **3a-5** and **3a-6**. To reduce noise, each point ( $d_i$ ) is given as an average value of previous and following five points ( $d_{i-5} - d_{i+5}$ ).

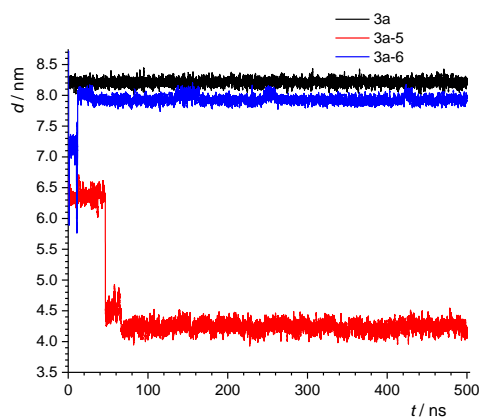

**Figure S38.** Distance between H-2Me and H-10 atoms during the MD simulations of compounds: **3a**, **3a-5** and **3a-6**. To reduce noise, each point ( $d_t$ ) is given as an average value of previous and following five points ( $d_{t-5} - d_{t+5}$ ).

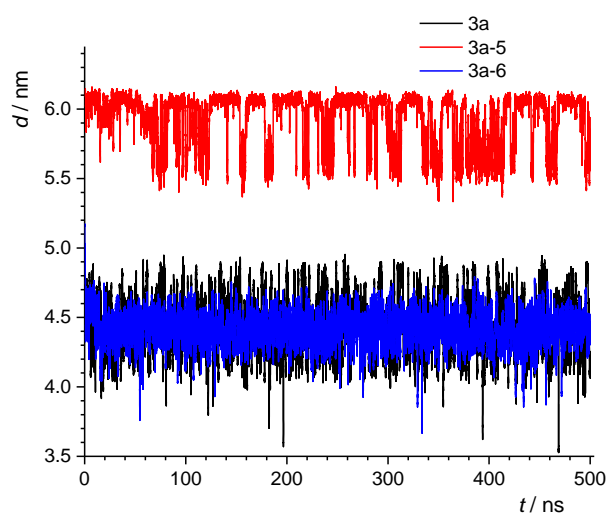

**Figure S39.** Distance between H-2Me and H-3b atoms during the MD simulations of compounds: **3a**, **3a-5** and **3a-6**. To reduce noise, each point ( $d_t$ ) is given as an average value of previous and following five points ( $d_{t-5} - d_{t+5}$ ).

**Table S3.** Monitored distances around C-2' atom during the 500 ns of molecular dynamics simulations for different diastereomeric configurations.

| Compound    | Configuration of C-2' atom | Distance / nm |               |
|-------------|----------------------------|---------------|---------------|
|             |                            | H2'-H4Me      | H2'-H4        |
| <b>3a</b>   | R                          | $5.0 \pm 0.2$ | $5.2 \pm 0.2$ |
| <b>3a-5</b> | S                          | $4.4 \pm 0.4$ | $4.5 \pm 0.4$ |
| <b>3a-6</b> | R                          | $4.7 \pm 0.2$ | $5.4 \pm 0.2$ |

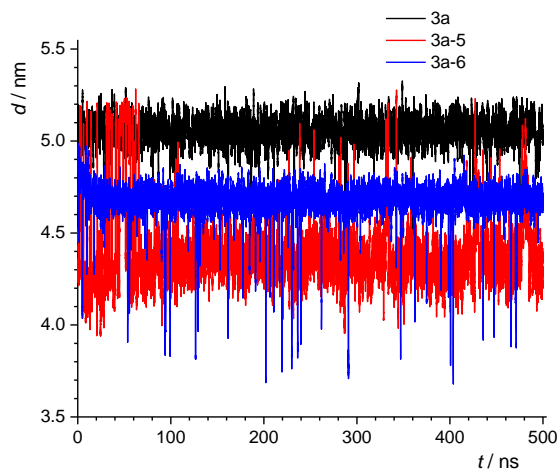

**Figure S40.** Distance between H-2' and H-4Me atoms during the MD simulations of compounds: **3a**, **3a-5** and **3a-6**. To reduce noise, each point ( $d_i$ ) is given as an average value of previous and following five points ( $d_{i-5} - d_{i+5}$ ).

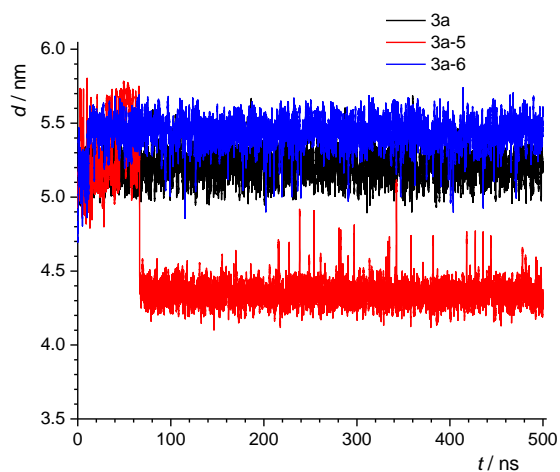

**Figure S41.** Distance between H-2' and H-4 atoms during the MD simulations of compounds: **3a**, **3a-5** and **3a-6**. To reduce noise, each point ( $d_i$ ) is given as an average value of previous and following five points ( $d_{i-5} - d_{i+5}$ ).

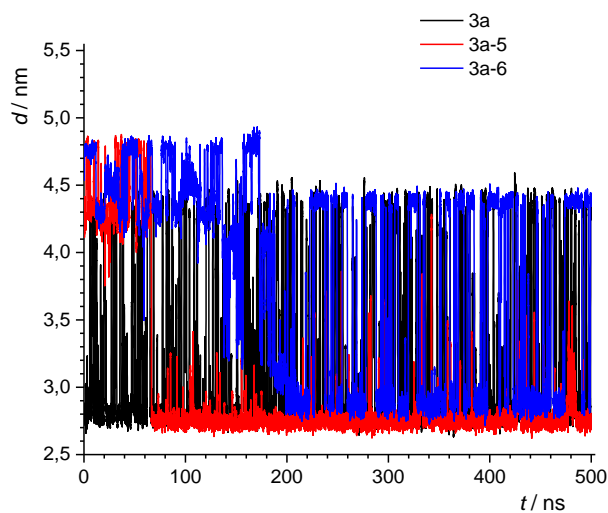

**Figure S42.** Distance between H-1' and H-6Me atoms during the MD simulations of compounds **3a**, **3a-5** and **3a-6**. To reduce noise, each point ( $d_t$ ) is given as an average value of previous and following five points ( $d_{t-5} - d_{t+5}$ ).

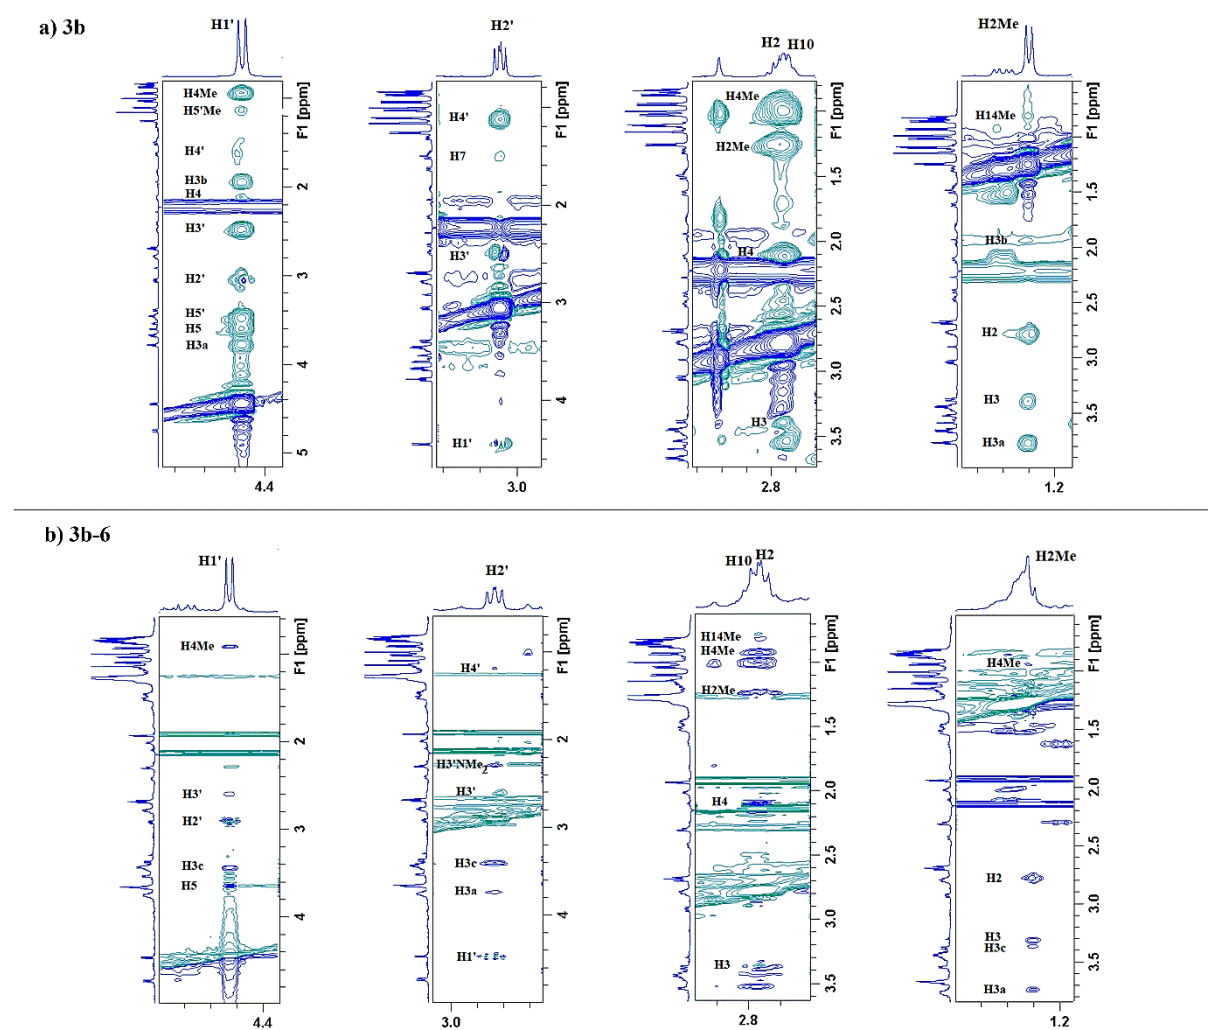

**Figure S43.** Narrow regions of the NOESY spectra of a) **3b** and b) **3b-6** for atoms H-1', H-2', H-2 and H-2Me.

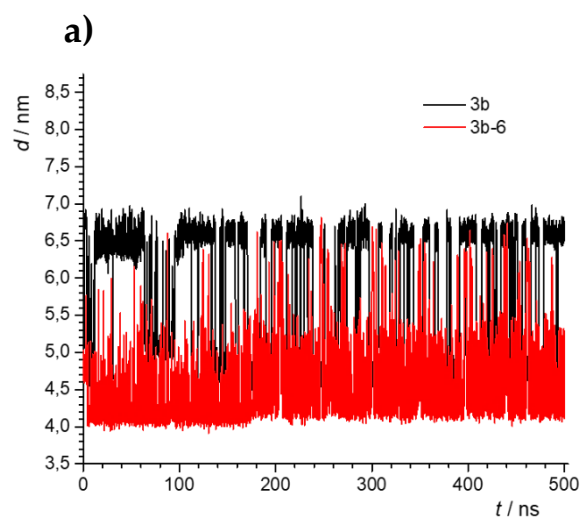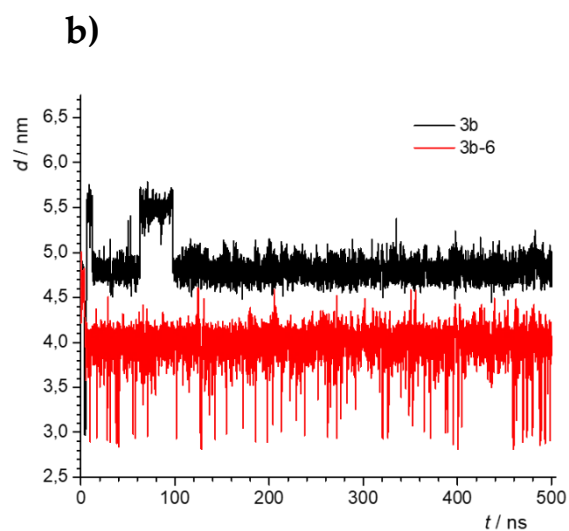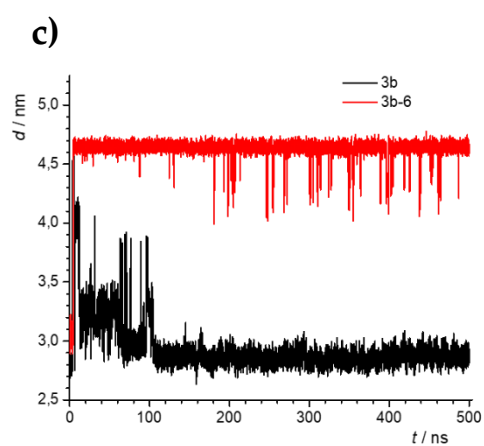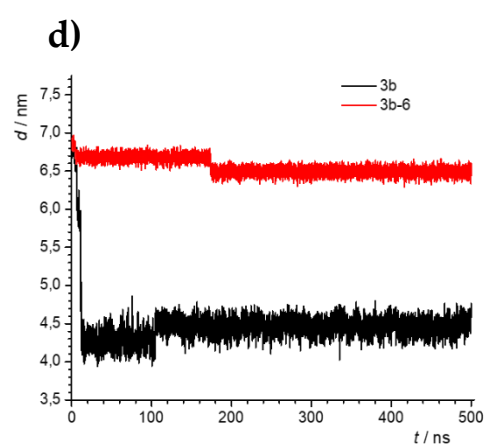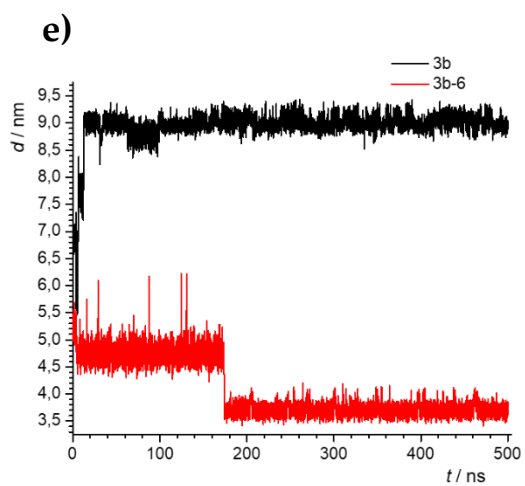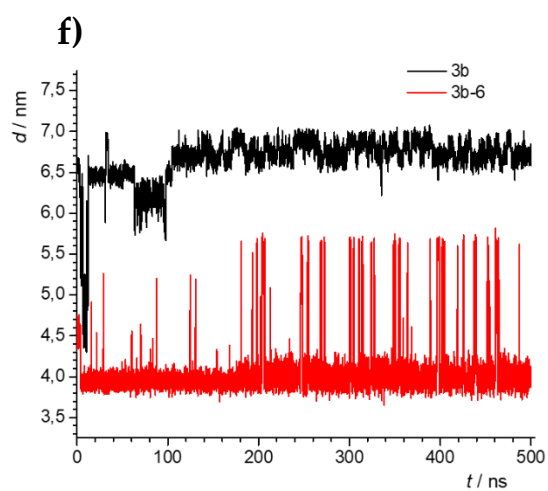

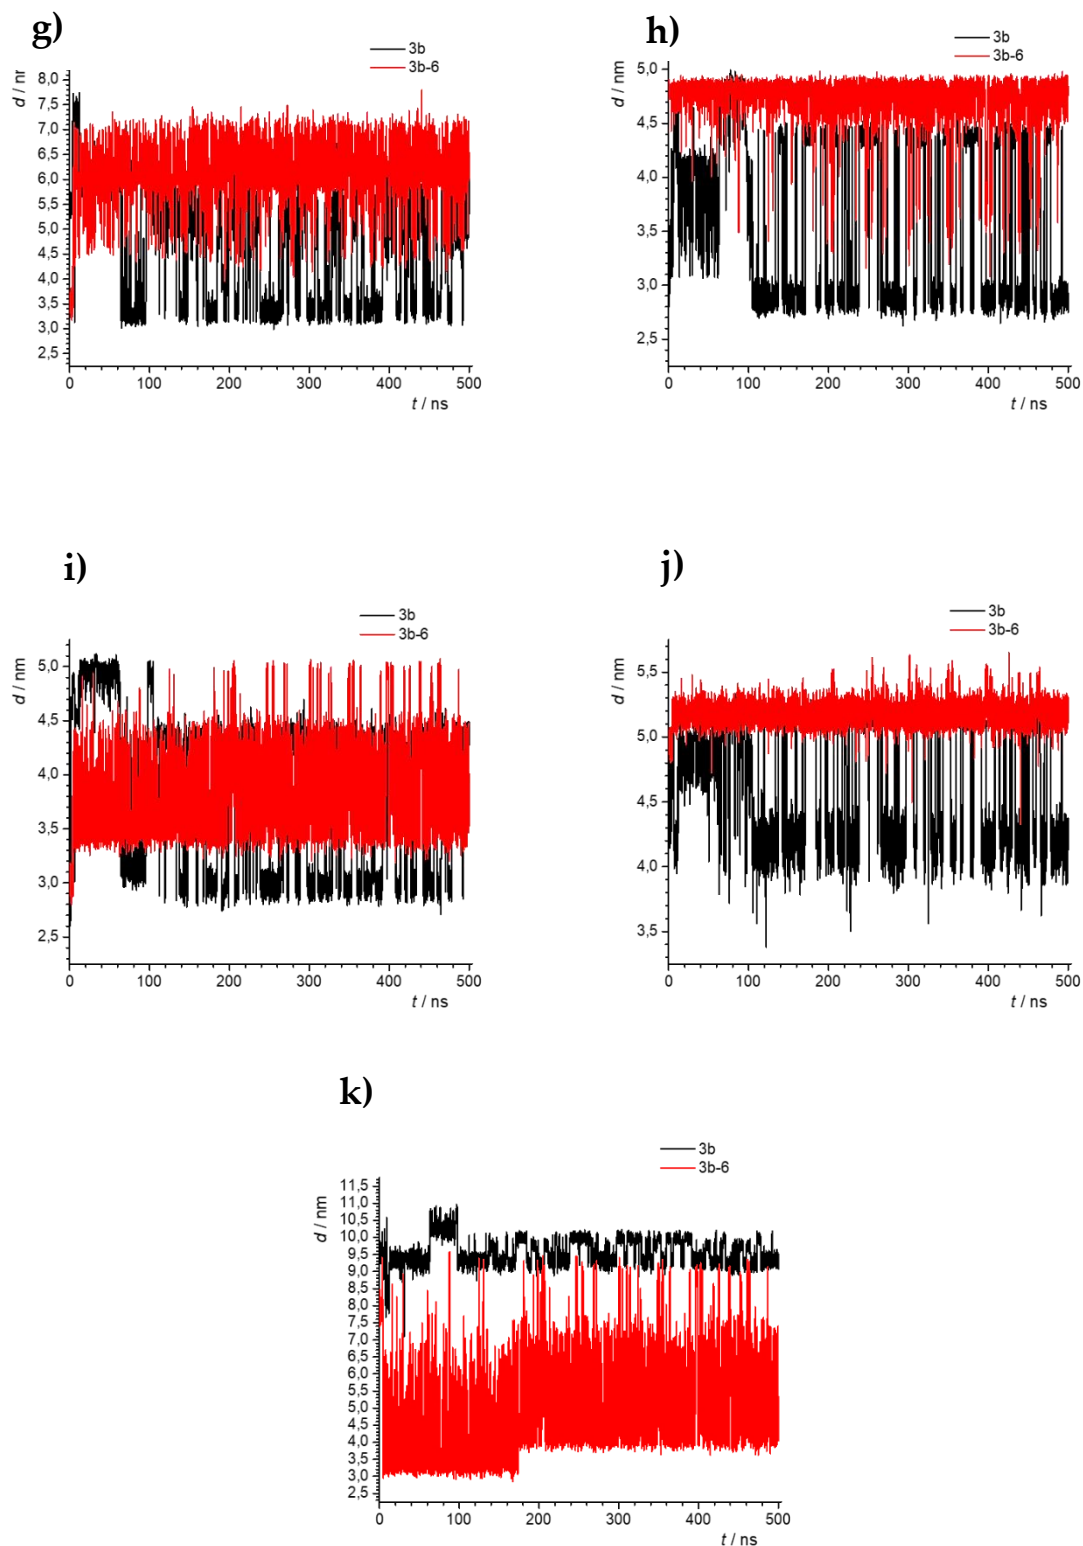

**Figure S44.** Distance between atoms: **a)** H-2 and H-1'; **b)** H-2 and H-3b; **c)** H-2 and H-4Me; **d)** H-2 and H-12Me; **e)** H-2Me and H-9a; **f)** H-2Me and H-7; **g)** H-1' and H-3b; **h)** H-1' and H-6Me; **i)** H-1' and H-4Me; **j)** H-2' and H-4Me; **k)** H-2' and H-13 during the MD simulations of compounds 3b and 3b-6. To reduce noise, each point ( $d_t$ ) is given as an average value of previous and following five points ( $d_{t-5} - d_{t+5}$ ).

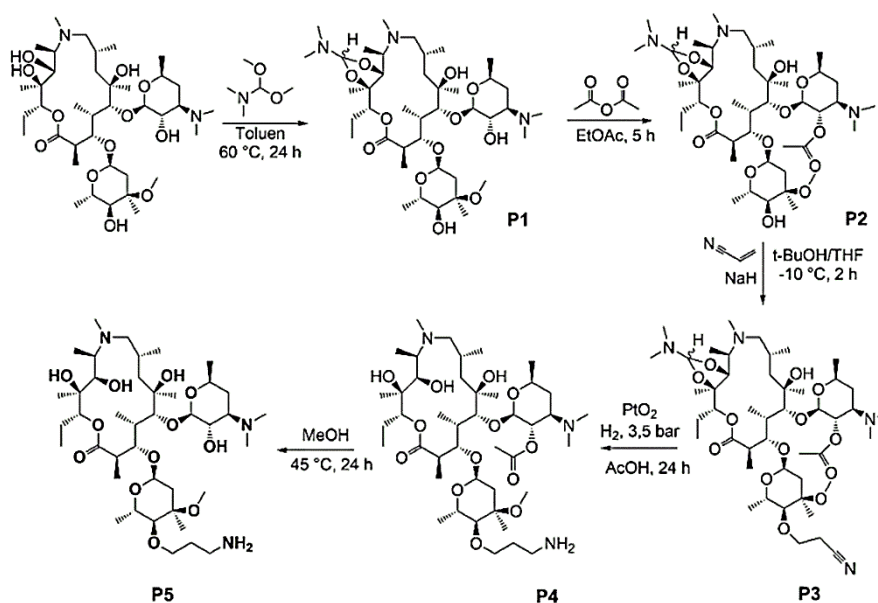

**Figure S45.** Synthetic route for the preparation of 4''-aminopropyl azithromycin (**P5**). Synthesis consists of several steps that include protection of more reactive hydroxyl groups (products **P1** and **P2**), the addition of acrylonitrile (product **P3**) followed by catalytic hydrogenation (product **P4**) and the removal of protective groups in the final step (product **P5**) [7-8].

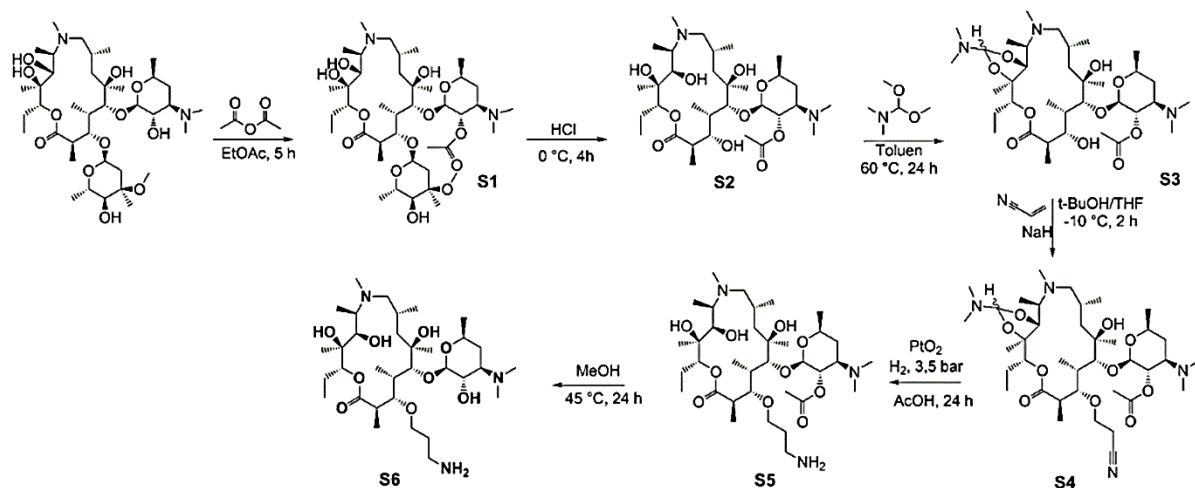

**Figure S46.** Synthetic route for the preparation of 3-aminopropyl azithromycin (**S6**). Synthesis consists of several steps that include removal of decladinose sugar unit under acidic conditions, protection of more reactive hydroxyl groups (product **S1-S3**), the addition of acrylonitrile (product **S4**) followed by catalytic hydrogenation (product **S5**) and the removal of protective groups in the final step (product **S6**) [7-8].

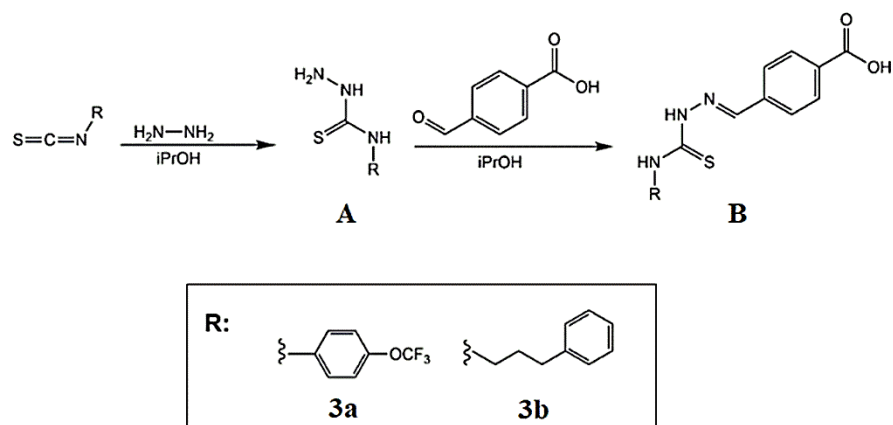

**Figure S47.** Synthetic route for the preparation of thiosemicarbazones. The first step involves a reaction between isothiocyanate and hydrazine monohydrate to form thiosemicarbazide (product **A**). The second step includes the reaction of thiosemicarbazide and 4-formylbenzoic acid to form thiosemicarbazone (product **B**) [7-8].
